# Supplementary material for: Significant role of the DNA backbone in mediating the transition origin of electronic excitations of B-DNA – implication from long range corrected TDDFT and quantified NTO analysis
Source: Royal Society of Chemistry journal article supplement (doi:10.1039/c2cp23676a), 2012-01-01
Supplement: c2cp23676a.pdf [file c2cp23676a.pdf]

## Supplemental Material

### Significant Role of DNA Backbone in Mediating the Transition Origin of Electronic Excitations of B-DNA – Implication from Long Range Corrected TDDFT and Quantified NTO Analysis

Jian-Hao Li<sup>a, b</sup>, Jeng-Da Chai<sup>a, c, \*</sup>, Guang-Yu Guo<sup>a, c, d</sup>, Michitoshi Hayashi<sup>b, \*</sup>

<sup>a</sup>Department of Physics, Center for Theoretical Sciences, National Taiwan University, Taipei, 10617, Taiwan

<sup>b</sup>Center for Condensed Matter Sciences, National Taiwan University, Taipei, 10617, Taiwan

<sup>c</sup>Center for Quantum Science and Engineering, National Taiwan University, Taipei, 10617, Taiwan

<sup>d</sup>Graduate Institute of Applied Physics, National Chengchi University, Taipei 11605, Taiwan

E-mail: jdchai@phys.ntu.edu.tw (J.-D. Chai); atmyh@ntu.edu.tw (M. Hayashi)

## Contents

|                                                                                                                                                                                                                               |    |
|-------------------------------------------------------------------------------------------------------------------------------------------------------------------------------------------------------------------------------|----|
| 1. Figure S1 for the various molecular segments extracted from X-ray diffraction determined B-DNA (PDB code 3BSE).                                                                                                            | S2 |
| 2. Table S1 for the major internal coordinates of DNA backbone of non-relaxed and partially relaxed ideal and 3BSE dTpdT.                                                                                                     | S2 |
| 3. Table S2 for the test of effects of solvent, geometry relaxation, and basis set on the excitation properties of ideal dTpdT.                                                                                               | S3 |
| 4. Figure S2 for the percentage of backbone density contribution to the NTO1-H and calculated absorption cross sections of the first 25 electronic excitations of the ideal dTpdT discussed in Table S2.                      | S3 |
| 5. Table S3 for the standard-orbitals projection coefficients or coefficients square of NTO1(2)-H(E) of several SO-hosted excitations of ideal Thy, dT, dTpdT, dTpdT--dApdA, and dApdTpdTpdG calculated by TD- $\omega$ B97X. | S5 |
| 6. References                                                                                                                                                                                                                 | S6 |

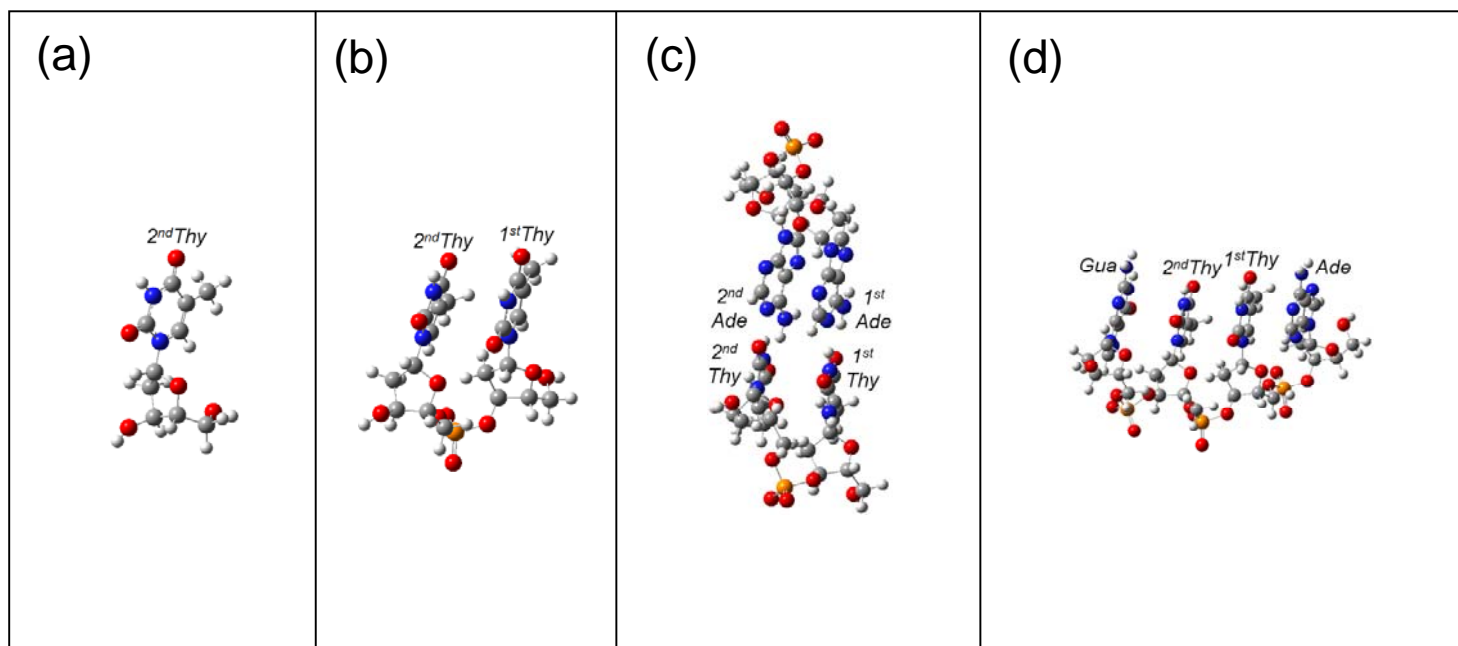

**Figure S1.** Various molecular segments extracted from X-ray diffraction determined B-DNA (PDB code 3BSE). The structures of (a) dT, (b) dTpdT, (c) dTpdT--dApdA, and (d) dApdTpdG under study are shown.

**TABLE S1:** The major internal coordinates of DNA backbone – nucleic-acid torsion angles – of non-relaxed and partially relaxed ideal and 3BSE dTpdT shown in Figure 1 and S1, adopted from the conventions defined in Chap. 5 of Ref. S1. All the torsion-angles of the two dTpdTs, whether relaxation has been performed or not, are fairly within the common ranges of B-DNA structures (p.132 of Ref. S1).

|                 |                 | Non-relaxed ideal dTpdT | Ideal dTpdT | Non-relaxed 3BSE dTpdT | 3BSE dTpdT |
|-----------------|-----------------|-------------------------|-------------|------------------------|------------|
| Angle           | Sequence        | Value(°)                | Value(°)    | Value(°)               | Value(°)   |
| $\beta_{T1}$    | H*-O5'-C5'-C4'  | -146.02040              | -169.40853  | -171.79766             | 179.98084  |
| $\gamma_{T1}$   | O5'-C5'-C4'-C3' | 36.36158                | 50.94523    | 40.98660               | 57.25397   |
| $\delta_{T1}$   | C5'-C4'-C3'-O3' | 156.40092               | 133.80945   | 132.93283              | 107.69943  |
| $\epsilon_{T1}$ | C4'-C3'-O3'-P   | 154.98268               | 175.21786   | -172.21242             | -176.35060 |
| $\zeta_{T1}$    | C3'-O3'-P-O5'   | -95.17465               | -97.41396   | -109.65894             | -85.03841  |
| $\alpha_{T2}$   | O3'-P-O5'-C5'   | -46.83902               | -61.78024   | -43.83471              | -60.41274  |
| $\beta_{T2}$    | P-O5'-C5'-C4'   | -146.00015              | -171.22393  | 172.24216              | 178.70789  |
| $\gamma_{T2}$   | O5'-C5'-C4'-C3' | 36.37464                | 50.67285    | 36.97245               | 49.02761   |
| $\delta_{T2}$   | C5'-C4'-C3'-O3' | 156.39855               | 133.33265   | 146.88308              | 138.98368  |
| $\epsilon_{T2}$ | C4'-C3'-O3'-H*  | 154.94931               | 173.65856   | -115.74378             | -140.36987 |
| $\chi_{T1}$     | O4'-C1'-N1-C2   | -97.99829               | -108.82575  | -110.05868             | -127.10523 |
| $\chi_{T2}$     | O4'-C1'-N1-C2   | -98.01020               | -111.93144  | -97.36020              | -105.49150 |

H\* denotes the P atom that is replaced with H atom upon molecule extraction.

**TABLE S2:** The first 10 SO-hosted excitations predicted by TD- $\omega$ B97X<sup>S2</sup> calculation of (a) non-relaxed ideal dTpdT without optimizing hydrogen and backbone atoms first (see main text), (b) ideal dTpdT with large basis set 6-311+G(df,p)<sup>S3, S4</sup>, and (c) ideal dTpdT put in water solvent of Polarizable Continuum Model (PCM)<sup>S5</sup> around the optimized dTp(dApdTpdpG)pdC--AdTp(dApdA)pdCG (see main text). The basis set used in (a) and (c) is 6-31G(d).  $\sigma_{G/E/B}$  stand for the variations of transition origin<sup>S6</sup> caused by the change of conformation, surrounding environment, and used basis set, respectively. The results of (a) and (c) are referenced to those of the ideal dTpdT shown in Table 1(b), also adopted here in the lower-right corner for a guide to the eye.

| N;<br>P                          | $\lambda$ (nm) | f      | NTO1(2)                    | $\sigma_{G/E}$ | %  | Type    | N;<br>P                         | $\lambda$ (nm) | f      | NTO1(2)                          | $\sigma_B$ | %  | Type    |
|----------------------------------|----------------|--------|----------------------------|----------------|----|---------|---------------------------------|----------------|--------|----------------------------------|------------|----|---------|
| (a) Non-relaxed ideal dTpdT      |                |        |                            |                |    |         | (b) Ideal dTpdT [6-311+G(df,p)] |                |        |                                  |            |    |         |
| 1                                | 239.30         | 0.0370 | P1t2 - S1t2                | 0.034          | 67 | B2      | 1                               | 243.96         | 0.0375 | P1t2 - S1t2                      | 0.029      | 65 | B2      |
| -                                |                |        | P1t1 - S1t1                |                | 30 |         | -                               |                |        | P1t1 - S1t1                      |            | 31 |         |
| 2                                | 236.23         | 0.4157 | P1t1 - S1t1                | 0.022          | 67 | B1      | 2                               | 241.43         | 0.4295 | P1t1(2) - S1t1(2)                | 0.067      | 67 | B1      |
| +                                |                |        | P1t2 - S1t2                |                | 30 |         | +                               |                |        | P1t1(2) - S1t1(2)                |            | 28 |         |
| 3                                | 235.97         | 0.0044 | N1t2 - S1t2 (S2t2)         | 0.042          | 98 | (A2)    | 3                               | 238.39         | 0.0045 | N1t1 - S1t1                      | 0.054      | 95 | A1      |
| 4                                | 235.06         | 0.0001 | N1t1 - S1t1 (S2t1)         | 0.025          | 98 | (A1)    | 4                               | 238.09         | 0.0000 | N1t2 - S1t2                      | 0.022      | 96 | A2      |
| 6                                | 192.01         | 0.0001 | N1t1 N2t1 - (S1t1) S2t1    | 0.021          | 96 | C1      | 5                               | 194.30         | 0.0175 | P1t1 (N2t1) - S1t2 S2t1          | 0.165      | 80 | (E1B12) |
| 7                                | 189.63         | 0.0292 | P1t1 - S1t2 S2t1           | 0.024          | 94 | E1B12   | 6                               | 193.40         | 0.0043 | (P1t1) (N1t1) N2t1 - (S1t2) S2t1 | 0.163      | 80 | (C1)    |
| 8                                | 188.34         | 0.0037 | N1t2 N2t2 - (S1t2) S2t2    | 0.036          | 95 | C2      | 7                               | 189.75         | 0.0193 | (N1t2) N2t2 - (S1t2) S2t2        | 0.069      | 88 | (C2)    |
| 9                                | 186.74         | 0.0478 | P1t2 B - S1t1 (S2t2)       | 0.157          | 88 | (E2B21) | 8                               | 189.57         | 0.1248 | P1t2 - S1t1 S2t2                 | 0.070      | 81 | E2B21   |
| 10                               | 185.94         | 0.0382 | P1t2 B - S1t1              | -              | 87 | (B21)   | 12                              | 182.59         | 0.0963 | P2t1 - S1t1                      | 0.082      | 54 | D1      |
| 12                               | 179.79         | 0.0912 | P1t2 - S1t1 S2t2           | -              | 92 | E2B21   | +                               |                |        | P1t1 - (S1t2) S2t1 O             |            | 31 |         |
|                                  |                |        |                            |                |    |         | 13                              | 181.18         | 0.0015 | P2t2 B - S1t2 (O)                | -          | 56 | (D2)    |
|                                  |                |        |                            |                |    |         | -                               |                |        | (P2t2) B - O                     |            | 21 |         |
| (c) Ideal dTpdT with PCM solvent |                |        |                            |                |    |         | Ideal dTpdT                     |                |        |                                  |            |    |         |
| 1                                | 241.74         | 0.0002 | (P2t1) B - S1t2            | -              | 98 | -       | 1                               | 237.59         | 0.0002 | N1t2 - S1t2 (S2t2)               | -          | 86 | (A2)    |
| 11                               | 173.28         | 0.0031 | (P1t12) (N1t1) B - S1t2    | -              | 98 | -       | 2                               | 237.48         | 0.0006 | N1t1 - S1t1 (S2t1)               | -          | 87 | (A1)    |
| 12                               | 170.91         | 0.0040 | (P1t2) (N1t1) (B) - S1t2   | -              | 92 | -       | 3                               | 234.83         | 0.0455 | P1t2 - S1t2                      | -          | 71 | B2      |
| 13                               | 170.67         | 0.0130 | (P1t12) (P2t1) B - S1t1(2) | -              | 87 | -       | 4                               | 232.27         | 0.4242 | P1t1 - S1t1                      | -          | 72 | B1      |
| 14                               | 168.71         | 0.0116 | (P1t12) B - S1t1(1)2       | -              | 83 | -       | 5                               | 192.51         | 0.0015 | N1t1 N2t1 - S2t1                 | -          | 96 | (C1)    |
| 15                               | 167.20         | 0.0318 | P2t1 B - S1t12             | -              | 69 | -       | 6                               | 188.85         | 0.0203 | P1t1 (B) - S1t2 (S2t1)           | -          | 92 | (E1B12) |
| +                                |                |        | N2t2 B - S1t1(1)2          | -              | 23 | -       | 7                               | 188.26         | 0.0009 | N1t2 N2t2 - (S1t2) S2t2          | -          | 93 | C2      |
| 16                               | 166.14         | 0.1027 | N2t2 (B) - S1t1(1)2        | -              | 67 | -       | 9                               | 183.96         | 0.1209 | P1t2 - S1t1 S2t2                 | -          | 89 | (E2B21) |
| -                                |                |        | P2t1 B - S1t1(2)           | -              | 25 | -       | 10                              | 177.62         | 0.0686 | P2t1 B - S1t1                    | -          | 72 | (D1)    |
| 18                               | 164.31         | 0.0094 | P1t1 B - S1t2              | -              | 92 | -       | 12                              | 176.87         | 0.0592 | P1t1(2) - (S1t2) S2t1            | -          | 54 | (E1B12) |
| 22                               | 160.29         | 0.0309 | P2t1 B - S1t1(1)2 (S2t1)   | -              | 80 | -       | -                               |                |        | P1t1(2) (P2t1) - S1t1            |            | 40 |         |
| 26                               | 153.48         | 0.0317 | N1t1 B - (S1t1) S2t1(1)2   | -              | 70 | -       |                                 |                |        |                                  |            |    |         |

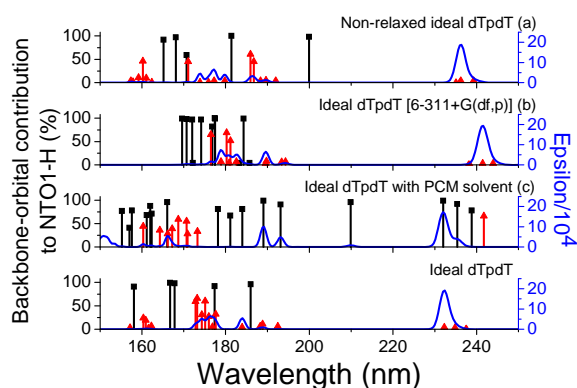

**Figure S2** Percentage of backbone density contribution to the NTO1-H (red and black columns) and calculated absorption cross sections (curves) of the first 25 electronic excitations of dTpdT systems discussed in Table S2. Red and black columns correspond to the SO-hosted and non-SO-hosted excitations, respectively. The absorption cross sections are plotted by broadening the oscillator strength of each excitation with 0.03eV of Half-Width at Half-Height.

### Relaxation and Basis Set Effect

From panels a and b of Table S2, it can be seen that up to some excitation reordering, the first several SO-hosted excitations remain in existence referencing the results of ideal dTpdT, namely, local Type-As, Type-Bs, Type-Cs, and Type-E1B12, Type-E2B21, except the highest two of ideal dTpdT that are replaced by Type-B21, Type-E2B21 in Table S2(a) and Type-D1, Type-D2 in Table S2(b). For the absorption energies of counterpart excitations, the two local Type-Bs, Type-E1B12, and Type-E2B21 have appreciable red-shifts both in (a) and (b) while the local Type-As and Type-Cs are all rather intact. For the oscillator strength, more noticeable changes can be found in (a) for Type-E1B12 and Type-E2B21, the former becoming stronger which should have something to do with the lifted backbone-orbitals in its NTO1-H, whereas the latter becoming weaker due to the involvement of backbone-orbitals in its NTO1-H. Finally, for the transition origin variations, most of the excitations in (a) and (b) have small values except the Type-E2B21 in (a) and the Type-E1B12 and Type-C1 in (b) that have pronounced transition origin variations.

From another aspect of view, Figure S2 shows that the absorption spectra for (a) and (b) are highly analogous to that of the ideal dTpdT, up to small energy-shifts. Taking a look at backbone-orbital contributions to NTO1-H, however, we see that the geometry relaxation lifts up the absorption energy of the lowest strong-backbone-involved excitation. It also makes several SO-hosted excitations around 170nm~180nm become strongly backbone-involved in their NTO1-Hs. Therefore, geometry relaxation effect is made clear only by analyzing the transition origins of excitations, giving another example that similar absorption spectrum can be borne by excitations of distinct transition origins. As the larger basis set 6-311G+(df,p) is used in calculation for the case (b), on the other hand, it happens that more backbone-dominant excitations are found around 170nm~190nm, which, accompanied with the results in Table S2(b), suggests that for higher-lying excitations formed by local Type-D/E and CT Type-B transitions a larger basis set than the economic 6-31G(d) become more important for obtaining consistent results. For lowering-lying excitations, however, the economic basis set 6-31G(d) has been good enough to produce reliable results.

### PCM Solvent Effect

Table S2(c) shows the results of ideal dTpdT affected by PCM solvent built around the optimized dTp(dApdTpdTpdG)pdC--AdTp(dApdA)pdCG. Surprisingly, not like the case of Table S2(a) and (b), the first several SO-hosted electronic excitations are qualitatively changed. Firstly, these SO-hosted excitations are generally located at higher positions with larger absorption energies. Secondly, the compositions of their transition origin are qualitatively different from those of the ideal dTpdT such that correspondences cannot be built. In addition, backbone orbital component is pervasively involved in their transition origins. Figure S2 provides a clearer demonstration of this situation, despite that the absorption spectrum does not bear so much change.

However, since the solvent is only taken into account classically exhibiting polarization field, more quantum mechanical tests are still needed. In a detail, the used PCM model creates solute cavity via a set of overlapping spheres around atoms and employs a continuous surface charge whose field is determined self-consistently with the solute electrostatic potential. Therefore, a solvent, when included, is only classically taken into account providing polarization field. With actual solvent molecules surrounding solutes should be indispensable for correct description of excitation properties as, for instance, the CT contribution has been shown to play a role in the excitations of dTpdT--dApdA and dApdTpdTpdG discussed in the main text.

**TABLE S3:** The detailed standard-orbitals projection coefficients or coefficients square of NTO1(2)-H(E) of several SO-hosted excitations of (a) ideal Thy, dT, di-Thy, dTpdT, dTpdT--dApdA, and dApdTpdTpdG and (b) 3BSE dT, dTpdT, dTpdT--dApdA, and dApdTpdTpdG calculated by TD- $\omega$ B97X/6-31G(d). For orbital-fraction from backbone, the coefficients square which corresponds to electronic density contribution is shown instead. (c) The data for the coefficients square of orbitals from adenine and/or guanine in the ideal dTpdT--dApdA and dApdTpdTpdG cases.

| (a)                | $\lambda$ (nm) | h-orbital        |                  |                  |                  |                  |                  |                  |                  | e-orbital        |                  |                  |                  |                  |      |
|--------------------|----------------|------------------|------------------|------------------|------------------|------------------|------------------|------------------|------------------|------------------|------------------|------------------|------------------|------------------|------|
|                    |                | P1 <sub>T1</sub> | P1 <sub>T2</sub> | N1 <sub>T1</sub> | N1 <sub>T2</sub> | P2 <sub>T1</sub> | P2 <sub>T2</sub> | N2 <sub>T1</sub> | N2 <sub>T2</sub> | (B) <sup>2</sup> | S1 <sub>T1</sub> | S1 <sub>T2</sub> | S2 <sub>T1</sub> | S2 <sub>T2</sub> |      |
| Ideal Thy          | 242.48         | 0.00             | -0.01            | 0.00             | 0.96             | 0.00             | -0.28            | 0.00             | 0.00             |                  | 0.00             | 0.92             | 0.00             | 0.31             |      |
|                    | 224.84         | 0.00             | 1.00             | 0.00             | 0.00             | 0.00             | 0.00             | 0.00             | -0.04            |                  | 0.00             | 1.00             | 0.00             | -0.04            |      |
|                    | 190.96         | 0.00             | 0.01             | 0.00             | 0.58             | 0.00             | 0.81             | 0.00             | 0.00             |                  | 0.00             | -0.32            | 0.00             | 0.91             |      |
|                    | 177.69         | 0.00             | 0.05             | 0.00             | 0.00             | 0.00             | 0.00             | 0.00             | 0.99             |                  | 0.00             | 1.00             | 0.00             | 0.05             |      |
|                    | 173.93         | 0.00             | 1.00             | 0.00             | 0.00             | 0.00             | 0.00             | 0.00             | 0.04             |                  | 0.00             | 0.05             | 0.00             | 1.00             |      |
|                    | 163.47         | 0.00             | -0.01            | 0.00             | 0.27             | 0.00             | 0.94             | 0.00             | 0.00             |                  | 0.00             | 0.96             | 0.00             | 0.28             |      |
|                    | 158.23         | 0.00             | 0.00             | 0.00             | 0.82             | 0.00             | -0.55            | 0.00             | 0.01             |                  | 0.00             | -0.35            | 0.00             | 0.90             |      |
| Ideal dT           | 241.11         | 0.00             | -0.01            | 0.00             | 0.96             | 0.00             | -0.28            | 0.00             | 0.00             | 0.00             | 0.00             | 0.92             | 0.00             | 0.32             |      |
|                    | 228.88         | 0.00             | 0.98             | 0.00             | 0.01             | 0.00             | 0.00             | 0.00             | -0.02            | 0.03             | 0.00             | 0.99             | 0.00             | -0.02            |      |
|                    | 189.38         | 0.00             | 0.01             | 0.00             | 0.58             | 0.00             | 0.78             | 0.00             | 0.00             | 0.04             | 0.00             | -0.29            | 0.00             | 0.92             |      |
|                    | 178.50         | 0.00             | 0.97             | 0.00             | 0.02             | 0.00             | -0.02            | 0.00             | 0.08             | 0.04             | 0.00             | 0.05             | 0.00             | 0.98             |      |
|                    | 176.13         | 0.00             | -0.01            | 0.00             | -0.01            | 0.00             | -0.04            | 0.00             | 0.98             | 0.01             | 0.00             | 0.99             | 0.00             | 0.08             |      |
|                    | 167.70         | 0.00             | 0.06             | 0.00             | 0.18             | 0.00             | 0.67             | 0.00             | 0.10             | 0.42             | 0.00             | 0.96             | 0.00             | 0.19             |      |
|                    | 158.12         | 0.00             | 0.00             | 0.00             | 0.72             | 0.00             | -0.62            | 0.00             | 0.05             | 0.03             | 0.00             | -0.56            | 0.00             | 0.80             |      |
| Ideal di-Thy       | 245.43         | -0.02            | 0.00             | 0.95             | 0.00             | -0.29            | 0.00             | 0.00             | 0.01             |                  | 0.93             | 0.01             | 0.30             | 0.04             |      |
|                    | 242.48         | -0.01            | -0.01            | 0.00             | 0.96             | 0.01             | -0.28            | 0.00             | -0.01            |                  | 0.03             | 0.92             | 0.06             | 0.31             |      |
|                    | 228.88         | -0.11            | 0.99             | -0.01            | 0.00             | -0.02            | 0.00             | 0.00             | -0.04            |                  | 0.02             | 0.99             | 0.08             | -0.02            |      |
|                    | 225.66         | 0.98             | -0.15            | 0.02             | -0.01            | 0.00             | 0.01             | 0.01             | -0.02            |                  | 0.99             | -0.07            | -0.07            | 0.06             |      |
|                    | 191.30         | 0.00             | 0.02             | 0.00             | 0.58             | -0.01            | 0.81             | 0.01             | 0.01             |                  | 0.05             | -0.35            | -0.01            | 0.91             |      |
|                    | 190.76         | 0.00             | -0.02            | 0.61             | 0.00             | 0.78             | 0.00             | 0.01             | 0.01             |                  | -0.29            | 0.14             | 0.91             | 0.01             |      |
|                    | 183.11         | 0.99             | 0.02             | -0.01            | 0.00             | 0.00             | 0.01             | -0.06            | 0.11             |                  | 0.02             | 0.79             | 0.62             | 0.07             |      |
|                    | 180.26         | 0.15             | 0.69             | 0.00             | 0.03             | -0.01            | 0.01             | -0.59            | 0.38             |                  | 0.87             | 0.36             | 0.10             | 0.32             |      |
|                    |                | 0.15             | -0.29            | 0.01             | 0.00             | 0.03             | 0.03             | 0.27             | 0.90             |                  | -0.35            | 0.93             | 0.06             | -0.12            |      |
|                    | 179.02         | -0.28            | 0.03             | 0.02             | -0.01            | 0.03             | -0.01            | -0.03            | 0.95             |                  | -0.09            | 0.99             | 0.11             | 0.03             |      |
|                    | 177.93         | 0.10             | 0.56             | -0.01            | 0.03             | -0.03            | -0.02            | 0.81             | 0.05             |                  | -0.96            | -0.02            | 0.00             | -0.27            |      |
|                    | 237.59         | -0.02            | 0.04             | 0.03             | 0.95             | 0.00             | -0.28            | 0.01             | -0.02            | 0.00             | 0.04             | 0.91             | 0.06             | 0.33             |      |
|                    | Ideal dTpdT    | 237.48           | -0.09            | 0.01             | 0.95             | -0.03            | -0.27            | 0.01             | 0.01             | 0.02             | 0.00             | 0.92             | 0.02             | 0.32             | 0.05 |
| 234.83             |                | -0.22            | 0.94             | -0.04            | -0.03            | -0.01            | 0.00             | 0.01             | 0.00             | 0.03             | 0.21             | 0.96             | 0.09             | 0.04             |      |
| 232.27             |                | 0.93             | -0.27            | 0.06             | -0.01            | 0.00             | 0.01             | -0.01            | -0.01            | 0.04             | 0.95             | -0.25            | -0.04            | 0.06             |      |
| 192.51             |                | -0.07            | -0.02            | 0.56             | 0.00             | 0.78             | 0.01             | 0.00             | 0.00             | 0.06             | -0.31            | 0.17             | 0.90             | 0.01             |      |
| 188.85             |                | 0.92             | 0.05             | 0.03             | 0.02             | 0.04             | 0.01             | -0.07            | 0.03             | 0.11             | -0.01            | 0.84             | 0.53             | 0.07             |      |
| 188.26             |                | -0.02            | 0.01             | 0.00             | 0.57             | -0.01            | 0.77             | 0.01             | 0.00             | 0.06             | 0.04             | -0.35            | -0.01            | 0.90             |      |
| 183.96             |                | 0.06             | 0.96             | -0.01            | 0.02             | -0.03            | 0.00             | -0.08            | 0.10             | 0.04             | 0.64             | 0.06             | 0.04             | 0.75             |      |
| 177.62             |                | 0.02             | -0.03            | -0.04            | 0.00             | -0.21            | -0.01            | 0.76             | -0.04            | 0.32             | 0.97             | 0.07             | 0.16             | 0.07             |      |
| 176.87             |                | 0.89             | -0.35            | 0.00             | -0.01            | -0.01            | -0.01            | 0.07             | -0.02            | 0.05             | 0.21             | 0.49             | -0.80            | -0.19            |      |
|                    |                | 0.36             | 0.78             | 0.01             | 0.01             | 0.01             | -0.01            | -0.46            | 0.11             | 0.04             | 0.88             | -0.28            | 0.12             | -0.31            |      |
| Ideal dTpdT--dApdA |                | 237.62           | -0.21            | 0.94             | 0.00             | 0.00             | -0.02            | 0.00             | 0.02             | -0.09            | 0.03             | 0.21             | 0.96             | 0.09             | 0.09 |
|                    |                | 235.23           | 0.93             | -0.25            | -0.02            | -0.02            | 0.00             | 0.00             | -0.08            | 0.00             | 0.04             | 0.96             | -0.22            | 0.02             | 0.05 |
|                    |                | 226.00           | 0.04             | -0.01            | 0.94             | 0.00             | -0.23            | 0.00             | -0.01            | 0.00             | 0.01             | 0.92             | 0.02             | 0.31             | 0.05 |
|                    | 224.87         | -0.01            | 0.00             | -0.01            | 0.93             | 0.00             | -0.23            | 0.01             | -0.01            | 0.01             | 0.03             | 0.91             | 0.06             | 0.33             |      |
|                    | 193.13         | -0.02            | -0.02            | 0.53             | -0.01            | 0.80             | 0.00             | 0.00             | 0.02             | 0.05             | -0.30            | 0.16             | 0.91             | 0.02             |      |
|                    | 189.37         | -0.01            | 0.02             | 0.00             | 0.53             | -0.01            | 0.81             | -0.01            | 0.01             | 0.05             | 0.05             | -0.32            | -0.01            | 0.92             |      |
|                    | 186.43         | 0.00             | 0.86             | -0.01            | 0.00             | -0.01            | 0.01             | -0.32            | 0.09             | 0.02             | 0.88             | -0.01            | 0.14             | 0.42             |      |
|                    |                | 0.86             | 0.07             | 0.02             | 0.01             | 0.01             | 0.01             | -0.13            | -0.25            | 0.05             | -0.13            | 0.84             | 0.49             | 0.11             |      |
|                    | 185.87         | 0.69             | 0.09             | -0.01            | 0.01             | 0.01             | -0.01            | -0.18            | 0.36             | 0.03             | 0.09             | 0.91             | 0.35             | 0.13             |      |
|                    | 185.10         | 0.47             | 0.61             | -0.02            | 0.00             | -0.07            | 0.01             | -0.31            | -0.13            | 0.02             | 0.61             | 0.67             | 0.18             | 0.33             |      |
|                    |                | -0.38            | 0.65             | 0.01             | -0.01            | -0.02            | -0.01            | -0.17            | 0.21             | 0.04             | 0.67             | -0.66            | -0.13            | 0.21             |      |
|                    | 182.27         | 0.08             | 0.27             | -0.04            | 0.01             | -0.14            | 0.00             | 0.55             | -0.01            | 0.05             | 0.78             | 0.15             | 0.09             | 0.14             |      |
|                    |                | 0.06             | 0.31             | -0.01            | 0.00             | -0.14            | -0.02            | 0.52             | 0.00             | 0.05             | 0.57             | -0.14            | 0.03             | 0.11             |      |
| Ideal dApdTpdTpdG  | 239.17         | 0.94             | -0.17            | -0.03            | -0.02            | 0.00             | 0.01             | -0.03            | -0.01            | 0.04             | 0.97             | 0.09             | 0.02             | 0.07             |      |
|                    | 235.85         | -0.14            | 0.95             | 0.00             | -0.02            | -0.01            | 0.00             | -0.01            | -0.01            | 0.04             | -0.13            | 0.97             | 0.10             | -0.03            |      |
|                    | 233.13         | 0.02             | 0.01             | 0.96             | 0.00             | -0.26            | 0.01             | 0.00             | 0.00             | 0.00             | 0.91             | 0.00             | 0.32             | 0.05             |      |
|                    | 232.75         | -0.01            | 0.00             | 0.00             | 0.96             | -0.01            | -0.27            | 0.02             | 0.00             | 0.00             | 0.03             | 0.91             | 0.08             | 0.34             |      |
|                    | 193.01         | -0.05            | -0.08            | 0.54             | 0.00             | 0.76             | -0.01            | 0.02             | 0.00             | 0.09             | -0.40            | 0.13             | 0.87             | 0.00             |      |
|                    | 191.28         | 0.08             | 0.96             | 0.02             | 0.00             | 0.00             | -0.01            | -0.07            | 0.10             | 0.04             | 0.80             | -0.01            | 0.05             | 0.52             |      |
|                    | 187.48         | 0.00             | 0.02             | -0.01            | 0.56             | 0.00             | 0.76             | -0.01            | 0.00             | 0.08             | 0.05             | -0.37            | -0.02            | 0.89             |      |
|                    | 187.00         | 0.93             | -0.06            | 0.00             | 0.00             | -0.02            | 0.01             | 0.00             | 0.02             | 0.07             | 0.01             | 0.50             | 0.75             | 0.06             |      |
|                    | 184.40         | -0.08            | 0.94             | 0.00             | -0.01            | -0.03            | -0.02            | -0.01            | -0.03            | 0.07             | 0.39             | 0.01             | 0.01             | -0.44            |      |
|                    | 179.35         | -0.09            | 0.94             | -0.01            | -0.02            | -0.02            | -0.02            | -0.03            | 0.01             | 0.06             | -0.30            | 0.01             | 0.04             | 0.68             |      |

| (b)                      | $\lambda$ (nm) | h-orbital        |                  |                  |                  |                  |                  |                  |                  |                  | e-orbital        |                  |                  |                  |
|--------------------------|----------------|------------------|------------------|------------------|------------------|------------------|------------------|------------------|------------------|------------------|------------------|------------------|------------------|------------------|
|                          |                | P1 <sub>T1</sub> | P1 <sub>T2</sub> | N1 <sub>T1</sub> | N1 <sub>T2</sub> | P2 <sub>T1</sub> | P2 <sub>T2</sub> | N2 <sub>T1</sub> | N2 <sub>T2</sub> | (B) <sup>2</sup> | S1 <sub>T1</sub> | S1 <sub>T2</sub> | S2 <sub>T1</sub> | S2 <sub>T2</sub> |
| 3BSE<br>dT               | 238.70         |                  | 0.02             |                  | 0.95             |                  | -0.31            |                  | -0.03            | 0.00             |                  | 0.92             |                  | 0.33             |
|                          | 224.38         |                  | 0.98             |                  | -0.02            |                  | 0.01             |                  | -0.02            | 0.03             |                  | 0.99             |                  | -0.02            |
|                          | 189.93         |                  | 0.06             |                  | 0.60             |                  | 0.76             |                  | 0.06             | 0.03             |                  | -0.29            |                  | 0.91             |
|                          | 176.14         |                  | 0.97             |                  | -0.03            |                  | -0.03            |                  | 0.12             | 0.03             |                  | 0.08             |                  | 0.98             |
|                          | 174.97         |                  | -0.02            |                  | 0.00             |                  | -0.06            |                  | 0.99             | 0.00             |                  | 0.99             |                  | 0.07             |
|                          | 166.91         |                  | 0.02             |                  | 0.21             |                  | 0.68             |                  | 0.04             | 0.42             |                  | 0.96             |                  | 0.19             |
| 158.09                   |                | 0.02             |                  | 0.57             |                  | -0.69            |                  | 0.00             | 0.12             |                  | -0.71            |                  | 0.68             |                  |
| 3BSE<br>dTpdT            | 238.62         | -0.10            | 0.01             | 0.94             | 0.01             | -0.28            | -0.01            | 0.02             | 0.01             | 0.00             | 0.92             | 0.01             | 0.32             | 0.01             |
|                          | 235.78         | -0.02            | 0.05             | 0.00             | 0.94             | 0.00             | -0.30            | 0.00             | -0.04            | 0.00             | 0.01             | 0.91             | 0.01             | 0.34             |
|                          | 231.46         | 0.93             | -0.22            | 0.12             | 0.00             | -0.04            | 0.01             | 0.00             | -0.03            | 0.05             | 0.97             | 0.21             | -0.04            | 0.01             |
|                          |                | 0.22             | 0.94             | 0.04             | -0.10            | -0.03            | 0.01             | 0.01             | 0.02             | 0.04             | -0.21            | 0.97             | 0.02             | 0.01             |
|                          | 226.76         | -0.19            | 0.95             | -0.01            | -0.03            | 0.00             | 0.00             | 0.02             | -0.02            | 0.04             | -0.18            | 0.97             | 0.01             | -0.03            |
|                          |                | 0.94             | 0.21             | 0.05             | -0.02            | -0.01            | 0.01             | -0.03            | -0.02            | 0.05             | 0.97             | 0.18             | -0.02            | 0.00             |
|                          | 191.98         | -0.11            | 0.01             | 0.58             | 0.01             | 0.77             | 0.01             | -0.02            | -0.01            | 0.04             | -0.29            | 0.02             | 0.92             | 0.00             |
|                          | 189.60         | 0.00             | 0.07             | -0.01            | 0.59             | 0.00             | 0.76             | 0.00             | 0.05             | 0.05             | 0.01             | -0.33            | 0.01             | 0.91             |
|                          | 185.01         | 0.91             | 0.07             | -0.01            | 0.01             | -0.01            | 0.00             | -0.01            | -0.03            | 0.14             | 0.01             | 0.97             | 0.17             | 0.05             |
|                          | 179.79         | 0.93             | -0.17            | 0.08             | 0.00             | 0.06             | 0.01             | 0.07             | -0.02            | 0.05             | 0.04             | -0.21            | 0.94             | 0.16             |
|                          | 178.10         | 0.01             | 0.55             | -0.02            | 0.02             | -0.09            | 0.00             | 0.53             | 0.08             | 0.37             | 0.94             | 0.00             | 0.04             | 0.30             |
|                          | 176.54         | 0.00             | 0.49             | 0.00             | -0.01            | 0.01             | 0.00             | 0.67             | 0.09             | 0.30             | 0.96             | -0.04            | 0.05             | -0.23            |
| 3BSE<br>dTpdT--<br>dApdA | 233.55         | 0.88             | -0.14            | -0.14            | -0.01            | 0.02             | 0.01             | -0.08            | -0.02            | 0.06             | 0.97             | 0.12             | 0.04             | 0.01             |
|                          | 228.95         | -0.07            | 0.90             | 0.00             | 0.10             | 0.01             | -0.02            | 0.00             | -0.10            | 0.05             | -0.05            | 0.97             | 0.03             | 0.06             |
|                          |                | -0.16            | -0.01            | 0.19             | 0.02             | -0.05            | 0.00             | 0.02             | 0.00             | 0.01             | 0.27             | 0.03             | 0.05             | 0.01             |
|                          | 227.76         | 0.16             | -0.01            | 0.92             | -0.01            | -0.24            | 0.01             | -0.02            | -0.01            | 0.02             | 0.92             | 0.02             | 0.31             | 0.02             |
|                          | 226.04         | -0.01            | -0.06            | 0.00             | 0.93             | 0.01             | -0.27            | 0.00             | -0.01            | 0.01             | 0.01             | 0.92             | 0.00             | 0.33             |
|                          | 192.02         | -0.09            | 0.01             | 0.55             | -0.01            | 0.79             | 0.00             | -0.02            | 0.01             | 0.04             | -0.27            | 0.01             | 0.91             | 0.00             |
|                          | 190.13         | 0.00             | 0.06             | 0.01             | 0.56             | 0.01             | 0.78             | 0.00             | 0.06             | 0.04             | 0.01             | -0.31            | -0.01            | 0.90             |
|                          | 184.59         | 0.05             | 0.02             | -0.04            | 0.00             | -0.06            | 0.01             | 0.67             | 0.01             | 0.03             | 0.94             | 0.12             | 0.15             | 0.05             |
|                          | 182.45         | -0.08            | 0.05             | 0.03             | 0.03             | 0.01             | -0.02            | 0.05             | 0.71             | 0.01             | 0.05             | 0.94             | 0.03             | 0.16             |
|                          |                | 0.00             | -0.03            | -0.02            | -0.02            | 0.00             | 0.03             | -0.06            | -0.25            | 0.01             | 0.06             | -0.19            | -0.01            | -0.05            |
|                          | 180.33         | 0.86             | 0.07             | -0.01            | 0.02             | -0.02            | 0.02             | -0.09            | 0.16             | 0.10             | -0.03            | 0.94             | 0.27             | 0.08             |
|                          | 180.05         | 0.08             | 0.89             | 0.01             | 0.04             | 0.02             | 0.00             | -0.07            | 0.07             | 0.05             | 0.96             | 0.02             | 0.05             | 0.18             |
|                          | 236.44         | 0.89             | -0.12            | -0.29            | -0.01            | 0.08             | 0.00             | -0.02            | -0.02            | 0.06             | 0.98             | 0.09             | 0.02             | 0.01             |
|                          | 233.70         | 0.22             | -0.02            | 0.93             | 0.00             | -0.26            | 0.01             | 0.00             | 0.00             | 0.01             | 0.92             | 0.03             | 0.30             | 0.01             |
|                          | 230.11         | -0.10            | 0.96             | 0.00             | 0.03             | 0.00             | -0.01            | 0.02             | -0.01            | 0.05             | -0.07            | 0.99             | 0.03             | -0.01            |
|                          | 227.65         | -0.01            | -0.04            | 0.00             | 0.94             | 0.00             | -0.29            | 0.01             | -0.02            | 0.00             | 0.01             | 0.91             | 0.01             | 0.34             |
|                          | 192.96         | 0.03             | -0.01            | 0.58             | 0.00             | 0.76             | -0.01            | -0.02            | -0.01            | 0.06             | -0.35            | -0.01            | 0.89             | 0.01             |
|                          | 188.75         | -0.02            | 0.07             | 0.00             | 0.57             | 0.01             | 0.74             | 0.00             | 0.05             | 0.09             | 0.01             | -0.38            | -0.01            | 0.89             |
| 183.57                   | 0.14           | 0.88             | -0.01            | 0.01             | -0.07            | 0.00             | 0.12             | 0.11             | 0.15             | 0.96             | 0.05             | 0.02             | 0.16             |                  |
|                          | 0.60           | -0.22            | 0.01             | 0.00             | -0.01            | 0.02             | 0.08             | -0.02            | 0.07             | -0.13            | 0.17             | 0.37             | -0.04            |                  |
| 182.41                   | -0.16          | 0.88             | -0.01            | 0.00             | -0.05            | 0.00             | 0.22             | 0.02             | 0.12             | 0.46             | -0.03            | -0.08            | -0.79            |                  |
|                          | 0.20           | -0.31            | -0.02            | -0.01            | -0.16            | 0.00             | 0.44             | 0.01             | 0.53             | 0.78             | 0.20             | 0.30             | 0.39             |                  |
| 181.67                   | 0.09           | 0.57             | 0.01             | 0.00             | 0.14             | -0.02            | -0.17            | 0.04             | 0.58             | 0.93             | 0.02             | 0.03             | -0.26            |                  |
| 181.06                   | 0.84           | 0.08             | -0.01            | 0.01             | -0.02            | -0.04            | -0.01            | -0.01            | 0.25             | -0.01            | 0.97             | 0.16             | 0.09             |                  |

| (c)    | $\lambda$ (nm) | dTpdT--dApdA |      |           |      | dApdTpdTpdG    |                  |                  |                  |                  |      |
|--------|----------------|--------------|------|-----------|------|----------------|------------------|------------------|------------------|------------------|------|
|        |                | h-orbital    |      | e-orbital |      | $\lambda$ (nm) | h-orbital        |                  | e-orbital        |                  |      |
|        |                | (A1)         | (A2) | (A1)      | (A2) |                | (G) <sup>2</sup> | (A) <sup>2</sup> | (G) <sup>2</sup> | (A) <sup>2</sup> |      |
| Ideal  | 237.62         | 0.00         | 0.00 | 0.00      | 0.00 | 239.17         | 0.00             | 0.00             | 0.01             | 0.01             |      |
|        | 235.23         | 0.00         | 0.00 | 0.00      | 0.00 | 235.85         | 0.00             | 0.00             | 0.00             | 0.00             |      |
|        | 226.00         | 0.05         | 0.00 | 0.00      | 0.00 | 233.13         | 0.00             | 0.00             | 0.00             | 0.01             |      |
|        | 224.87         | 0.00         | 0.05 | 0.00      | 0.00 | 232.75         | 0.00             | 0.00             | 0.00             | 0.00             |      |
|        | 193.13         | 0.00         | 0.00 | 0.00      | 0.00 | 193.01         | 0.00             | 0.00             | 0.00             | 0.01             |      |
|        | 189.37         | 0.00         | 0.00 | 0.00      | 0.00 | 191.28         | 0.01             | 0.07             | 0.00             | 0.01             |      |
|        | 186.43         | 0.07         | 0.04 | 0.00      | 0.01 | 187.48         | 0.00             | 0.01             | 0.00             | 0.00             |      |
|        |                | 0.00         | 0.12 | 0.00      | 0.00 | 187.00         | 0.00             | 0.00             | 0.03             | 0.17             |      |
|        | 185.87         | 0.01         | 0.29 | 0.00      | 0.00 | 184.40         | 0.01             | 0.61             | 0.00             | 0.01             |      |
|        | 185.10         | 0.02         | 0.24 | 0.01      | 0.01 | 179.35         | 0.01             | 0.41             | 0.00             | 0.00             |      |
|        |                | 0.01         | 0.29 | 0.02      | 0.01 |                |                  |                  |                  |                  |      |
|        | 182.27         | 0.06         | 0.46 | 0.30      | 0.02 |                |                  |                  |                  |                  |      |
|        |                | 0.08         | 0.44 | 0.58      | 0.04 |                |                  |                  |                  |                  |      |
|        | 3BSE           | 233.55       | 0.00 | 0.00      | 0.00 | 0.00           | 236.44           | 0.00             | 0.00             | 0.01             | 0.01 |
|        |                | 228.95       | 0.02 | 0.00      | 0.00 | 0.00           | 233.70           | 0.01             | 0.00             | 0.00             | 0.00 |
|        |                |              | 0.79 | 0.13      | 0.84 | 0.07           | 230.11           | 0.00             | 0.00             | 0.00             | 0.00 |
|        |                | 227.76       | 0.02 | 0.00      | 0.00 | 0.00           | 227.65           | 0.00             | 0.00             | 0.01             | 0.00 |
|        |                | 226.04       | 0.00 | 0.04      | 0.00 | 0.00           | 192.96           | 0.00             | 0.00             | 0.00             | 0.02 |
| 192.02 |                | 0.01         | 0.00 | 0.00      | 0.00 | 188.75         | 0.00             | 0.01             | 0.00             | 0.00             |      |
| 190.13 |                | 0.00         | 0.01 | 0.01      | 0.00 | 183.57         | 0.00             | 0.00             | 0.01             | 0.02             |      |
| 184.59 |                | 0.11         | 0.38 | 0.02      | 0.02 |                | 0.00             | 0.00             | 0.50             | 0.80             |      |
| 182.45 |                | 0.10         | 0.35 | 0.03      | 0.02 | 182.41         | 0.00             | 0.12             | 0.01             | 0.01             |      |
|        |                | 0.76         | 0.14 | 0.33      | 0.58 |                | 0.00             | 0.02             | 0.08             | 0.06             |      |
| 180.33 |                | 0.00         | 0.00 | 0.00      | 0.00 | 181.67         | 0.00             | 0.02             | 0.01             | 0.01             |      |
| 180.05 |                | 0.04         | 0.00 | 0.00      | 0.00 | 181.06         | 0.00             | 0.00             | 0.01             | 0.00             |      |

## References

- (S1) T. Schlick, *Molecular Modeling and Simulation*; Springer, New York, 2002.  
 (S2) J.-D. Chai and M. Head-Gordon, *J. Chem. Phys.*, 2008, **128**, 084106.  
 (S3) A. D. McLean and G. S. Chandler, *J. Chem. Phys.*, 1980, **72**, 5639.  
 (S4) R. Krishnan, J. S. Binkley, R. Seeger and J. A. Pople, *J. Chem. Phys.*, 1980, **72**, 650.  
 (S5) J. Tomasi, B. Mennucci and R. Cammi, *Chem. Rev.*, 2005, **105**, 2999.  
 (S6) J.-H. Li, J.-D. Chai, G. Y. Guo and M. Hayashi, *Chem. Phys. Lett.*, 2011, **514**, 362.
